# Supplementary material
Source: PubMed Central journal article supplement (PMC10473558)
Supplement: awad236_supplementary_data.pdf [file awad236_supplementary_data.pdf]

## Supplementary Material

Supplementary Table 1. SED assessments in representative online datasets – detailed version

| Dataset                                                                                                               | Type of information provided                                                                                                                                                                                                                                                                                                                                                                                                                                                                                                                                                                                                                                                                                                                                       | Direct SED measure                                                                                                               | Indirect SED measures                                                                                                                                                                                               | Data origin |
|-----------------------------------------------------------------------------------------------------------------------|--------------------------------------------------------------------------------------------------------------------------------------------------------------------------------------------------------------------------------------------------------------------------------------------------------------------------------------------------------------------------------------------------------------------------------------------------------------------------------------------------------------------------------------------------------------------------------------------------------------------------------------------------------------------------------------------------------------------------------------------------------------------|----------------------------------------------------------------------------------------------------------------------------------|---------------------------------------------------------------------------------------------------------------------------------------------------------------------------------------------------------------------|-------------|
| Alzheimer's Disease Neuroimaging Initiative (ADNI)<br><a href="http://adni.loni.usc.edu">http://adni.loni.usc.edu</a> | <ul style="list-style-type: none"> <li>▪ Clinical (demographics, clinical and cognitive assessments)</li> <li>▪ Genetic (Genotyping and Whole Genome Sequencing data)</li> <li>▪ Neuroimaging (MRI and PET)</li> <li>▪ Biospecimen</li> </ul>                                                                                                                                                                                                                                                                                                                                                                                                                                                                                                                      | NAI                                                                                                                              | Demographics: Age(years), Education (years), Gender, Race, Ethnicity, Occupation, Type of residence.                                                                                                                | US, Canada  |
| National Alzheimer's Coordinating Center (NACC) Database<br><a href="https://naccdata.org">https://naccdata.org</a>   | <ul style="list-style-type: none"> <li>▪ Clinical (demographics, clinical and cognitive assessments)</li> <li>▪ Neuropathology (autopsy data)</li> <li>▪ Neuroimaging (MRI and PET)</li> <li>▪ Fluid biomarker (CSF data)</li> <li>▪ Genotypic and genomic data</li> </ul>                                                                                                                                                                                                                                                                                                                                                                                                                                                                                         | NAI                                                                                                                              | Demographics: Age(years), Education (years), Sex, Race, Ethnicity, Type of residence, Living situation, ZIP Code.                                                                                                   | US          |
| Rush Alzheimer's Disease Center (RADC) Datasets<br><a href="https://www.radc.rush.edu">https://www.radc.rush.edu</a>  | <ul style="list-style-type: none"> <li>▪ Actigraphy</li> <li>▪ Affect and Personality</li> <li>▪ ApoE and TOMM40</li> <li>▪ Blood Measures</li> <li>▪ Brain Proteins</li> <li>▪ Clinical Diagnosis</li> <li>▪ Cognition</li> <li>▪ Cultural Experiences</li> <li>▪ Decision Making and Behavioral</li> <li>▪ Economics</li> <li>▪ Demographics</li> <li>▪ Depression</li> <li>▪ Digital Pen Device</li> <li>▪ Disabilities</li> <li>▪ Female Reproductive History</li> <li>▪ Frailty</li> <li>▪ Lifestyle</li> <li>▪ Medical Conditions</li> <li>▪ Medicare Claims</li> <li>▪ Medications</li> <li>▪ Metabolism</li> <li>▪ Metabolomics</li> <li>▪ Motor and Gait</li> <li>▪ Neck, Low Back and Joint Pain</li> <li>▪ Neuroimaging</li> <li>▪ Nutrition</li> </ul> | SES: Income, Income (age 40), Parental education level [Maternal education (years), Paternal education (years)], Subjective SES. | Demographics: Age(years), Education (years), Sex, Race, Ethnicity, Marital status.<br><br>Income, Income (age 40).<br><br>Cognitive resources (i.e., <i>n</i> of newspaper, encyclopaedia, books) at age 12 and 40. | US          |

|                                                                                                                                                                     |                                                                                                                                                                                                                                                                                                                        |     |                                                                                                                                                      |                                                                                                                                                                                                                                                               |                                                                                                   |
|---------------------------------------------------------------------------------------------------------------------------------------------------------------------|------------------------------------------------------------------------------------------------------------------------------------------------------------------------------------------------------------------------------------------------------------------------------------------------------------------------|-----|------------------------------------------------------------------------------------------------------------------------------------------------------|---------------------------------------------------------------------------------------------------------------------------------------------------------------------------------------------------------------------------------------------------------------|---------------------------------------------------------------------------------------------------|
|                                                                                                                                                                     | <ul style="list-style-type: none"> <li>▪ Olfaction</li> <li>▪ Pathology</li> <li>▪ Pulmonary Function</li> <li>▪ Sleep and Circadian Rhythms</li> <li>▪ SES</li> <li>▪ Vision</li> <li>▪ Well-being</li> </ul>                                                                                                         |     |                                                                                                                                                      |                                                                                                                                                                                                                                                               |                                                                                                   |
| <p>Australian Imaging, Biomarker &amp; Lifestyle Flagship Study of Ageing (AIBL)</p> <p><a href="https://aibl.csiro.au">https://aibl.csiro.au</a></p>               | <ul style="list-style-type: none"> <li>▪ Clinical (Demographics, clinical and cognitive assessments)</li> <li>▪ Neuroimaging (MRI and PET)</li> <li>▪ Fluid biomarkers (Blood and CSF data)</li> <li>▪ Health and lifestyle factors</li> </ul>                                                                         | NAI |                                                                                                                                                      | NAI                                                                                                                                                                                                                                                           | Australia                                                                                         |
| <p>Parkinson's Progression Markers Initiative (PPMI)</p> <p><a href="https://www.ppmi-info.org">https://www.ppmi-info.org</a></p>                                   | <ul style="list-style-type: none"> <li>▪ Clinical (Demographics, clinical and cognitive assessment)</li> <li>▪ Physical and neurological examination</li> <li>▪ Neuroimaging (MRI, DTI)</li> <li>▪ Biomarkers (Blood, CSF, serum, plasma, urine, skin biopsies)</li> <li>▪ Genetic data</li> </ul>                     | NAI |                                                                                                                                                      | Demographics: Age(years), Education (years), Gender, Race, Ethnicity.                                                                                                                                                                                         | US, Canada, Spain, Luxembourg, Greece, Austria, Germany, UK, Netherlands, Italy, Israel, Nigeria. |
| <p>Cambridge Centre for Ageing and Neuroscience (Cam-CAN)</p> <p><a href="http://www.cam-can.org">http://www.cam-can.org</a></p>                                    | <ul style="list-style-type: none"> <li>▪ Clinical (Demographics, cognitive assessment)</li> <li>▪ Neuroimaging data (MRI)</li> <li>▪ Physiological measures (blood pressure, height, weight)</li> </ul>                                                                                                                | NAI |                                                                                                                                                      | Demographics: Age(years), Education (years), Gender, Ethnicity, Marital status, Accommodation, Employment, Income, Birthplace, and English language history.                                                                                                  | UK                                                                                                |
| <p>National Institute on Aging Genetics of Alzheimer's Disease Data Storage Site (NIAGADS)</p> <p><a href="https://www.niagads.org">https://www.niagads.org</a></p> | <ul style="list-style-type: none"> <li>▪ Genetic data</li> </ul>                                                                                                                                                                                                                                                       | NAI |                                                                                                                                                      | NAI                                                                                                                                                                                                                                                           | US                                                                                                |
| <p>UK Biobank</p> <p><a href="https://www.ukbiobank.ac.uk">https://www.ukbiobank.ac.uk</a></p>                                                                      | <ul style="list-style-type: none"> <li>▪ Clinical (Demographics, clinical and cognitive assessment)</li> <li>▪ Neuroimaging (MRI)</li> <li>▪ Biomarkers (Blood, saliva, urine)</li> <li>▪ Early life and reproductive factors</li> <li>▪ Genetic data</li> <li>▪ Lifestyle</li> <li>▪ Geographical measures</li> </ul> |     | Index of Multiple Deprivation: access to service; community safe, crime, education, health, housing, income, living and physical environment scores. | Demographics: Age(years), Education (years), Sex, Ethnicity.<br>Employment.<br>Employment history.<br>Household (gas, heating, <i>n</i> people, own or rent, vehicles).<br>Type of residence.<br>Private healthcare.<br>Geographical measures: Greenspace and | UK                                                                                                |

|                                                                                                                                     |                                                                                                                                                                                                                                         |     |  |                                                                                                                                                                     |     |
|-------------------------------------------------------------------------------------------------------------------------------------|-----------------------------------------------------------------------------------------------------------------------------------------------------------------------------------------------------------------------------------------|-----|--|---------------------------------------------------------------------------------------------------------------------------------------------------------------------|-----|
|                                                                                                                                     |                                                                                                                                                                                                                                         |     |  | coastal proximity.                                                                                                                                                  |     |
|                                                                                                                                     |                                                                                                                                                                                                                                         |     |  | Home locations.                                                                                                                                                     |     |
|                                                                                                                                     |                                                                                                                                                                                                                                         |     |  | Residential air and noise pollution.                                                                                                                                |     |
| Enhancing Neuroimaging Genetics through Meta-Analysis (ENIGMA)<br><a href="http://enigma.ini.usc.edu">http://enigma.ini.usc.edu</a> | <ul style="list-style-type: none"> <li>▪ Medical data</li> <li>▪ Genetic data</li> <li>▪ Neuroimaging data</li> </ul>                                                                                                                   | NAI |  | NAI                                                                                                                                                                 | NAI |
| Human Connectome Project (HCP) [HCP Aging dataset]<br><a href="https://www.humanconnectome.org">https://www.humanconnectome.org</a> | <ul style="list-style-type: none"> <li>▪ Clinical (Demographics, clinical and cognitive assessment)</li> <li>▪ Lifestyle data</li> <li>▪ Neuroimaging (MRI)</li> </ul>                                                                  | NAI |  | Demographics: Age(years), Sex.                                                                                                                                      | US  |
| Baltimore Longitudinal Study of Aging (BLSA)**<br><a href="https://www.blsa.nih.gov">https://www.blsa.nih.gov</a>                   | <ul style="list-style-type: none"> <li>▪ Clinical (Demographics, Weight history, Body measurements, Activity-related fatigue, Physical performance, Hearing, Vision, Grip strength, medical data)</li> </ul>                            | NAI |  | Demographics: Age(years), Education (years), Sex, Race, Ethnicity, Marital status, Living situation (n people).<br>Health care access.                              | US  |
| Health and Retirement Study (HRS)**<br><a href="https://hrs.isr.umich.edu">https://hrs.isr.umich.edu</a>                            | <ul style="list-style-type: none"> <li>▪ Clinical (Demographics, clinical and cognitive assessments)</li> <li>▪ Health Data</li> <li>▪ Genetic Data</li> <li>▪ Biomarkers Data (Blood measures)</li> <li>▪ Life History Data</li> </ul> | NAI |  | Demographics: Age(years), Education (years), Gender, Race, Ethnicity, Immigration status, School (years).<br>Geographical and Residential History.<br>Work History. | US  |

\*\* dataset non-specific for brain health. SED: Socioeconomic disparities. SES: Socio-economic status. NAI: Non available information. UK: United Kingdom. US: United States of America.
